# Supplementary material for: Convergent Loss of Awn in Two Cultivated Rice Species Oryza sativa and Oryza glaberrima Is Caused by Mutations in Different Loci
Source: PubMed Central journal article supplement (PMC4632046; doi:10.1534/g3.115.020834), 2015-09-02
Supplement: supp_g3.115.020834_020834SI.pdf [file supp_g3.115.020834_020834SI.pdf]

## Convergent loss of awn in two cultivated rice species *Oryza sativa* and *Oryza glaberrima* is caused by mutations in different loci

Tomoyuki Furuta\*, Norio Komeda\*, Kenji Asano\*, Kanako Uehara\*, Rico Gamuyao\*, Rosalyn B. Shim-Angeles\*, Keisuke Nagai\*, Kazuyuki Doi\*, Diane R. Wang<sup>§</sup>, Hideshi Yasui<sup>†</sup>, Atsushi Yoshimura<sup>†</sup>, Jianzhong Wu<sup>‡</sup>, Susan R. McCouch<sup>§</sup> and Motoyuki Ashikari\*

\* Bioscience and Biotechnology Center, Nagoya University, Furo-cho, Chikusa, Nagoya, Aichi 464-8601, Japan

<sup>§</sup> Department of Plant Breeding and Genetics, Cornell University, 162 Emerson Hall, Ithaca, NY 14853-1901, USA

<sup>†</sup> Plant Breeding Laboratory, Kyushu University, 6-10-1 Hakozaki, Higashi-ku, Fukuoka 812-8581, Japan

<sup>‡</sup> National Institute of Agrobiological Sciences, Tsukuba, Ibaraki 305-8634, Japan

Corresponding author: Susan R. McCouch and Motoyuki Ashikari

For Susan R. McCouch

Address: Department of Plant Breeding and Genetics, Cornell University, 162 Emerson Hall, Ithaca, NY 14853-1901, USA

TEL: 1-607-255-0420

Email: srm4@cornell.edu

For Motoyuki Ashikari

Address: Bioscience and Biotechnology Center, Nagoya University, Furo-cho, Chikusa, Nagoya, Aichi 464-8601, Japan

TEL: 81-52-789-5202

Email: ashi@agr.nagoya-u.ac.jp

DOI: 10.1534/g3.115.020834

|                      |     |                      |                                                           |                      |                        |                        |     |
|----------------------|-----|----------------------|-----------------------------------------------------------|----------------------|------------------------|------------------------|-----|
|                      |     | 1 <sup>st</sup> exon |                                                           | 2 <sup>nd</sup> exon |                        |                        |     |
| <i>O. glaberrima</i> | 1   | MNP                  |                                                           | TTAAAADQPSKPS        | AAAARKRKSSAKPKASSSSLP  | TATAATNASPKRSKVAAGAGDD | 59  |
| <i>O. sativa</i>     | 1   | MNP                  |                                                           | TTAAAADQPSKPS        | AAAAARKRKSSAKPKASSSSLP | TATAATNASPKRSKVAAGAGDD | 60  |
|                      |     |                      | Ins(GCC)                                                  |                      | Sub(GCG -> ACG)        |                        |     |
|                      |     |                      |                                                           |                      | 3 <sup>rd</sup> exon   | 4 <sup>th</sup> exon   |     |
| <i>O. glaberrima</i> | 60  | GDG                  | DADAAEEKPEPAKDYIHVRARRGQATDSHSLAERVRRERISERMKLLQSLVPGCNKI |                      |                        |                        | 119 |
| <i>O. sativa</i>     | 61  | GD                   | DADAAEEKPEPAKDYIHVRARRGQATDSHSLAERVRRERISERMKLLQSLVPGCNKI |                      |                        |                        | 120 |
|                      |     |                      | Sub(GGC -> GCC)                                           |                      |                        |                        |     |
|                      |     |                      |                                                           | 5 <sup>th</sup> exon | 6 <sup>th</sup> exon   |                        |     |
| <i>O. glaberrima</i> | 120 | TGKALMLDEI           | INYVQSLQRQVEFLSMKCLATMNPQLDFDSHYMP                        | SKDMSHMPVPAYPS       | GDP                    |                        | 179 |
| <i>O. sativa</i>     | 121 | TGKALMLDEI           | INYVQSLQRQVEFLSMKCLATMNPQLDFDSHYMP                        | SKDMSHMPVPAYP        | SSDP                   |                        | 180 |
|                      |     |                      |                                                           | Sub(GGC -> AGC)      |                        |                        |     |
| <i>O. glaberrima</i> | 180 | TTTTAF               | SYTGSPATADPFTVYNCWELDLHTAMQMGATT                          | GLSQDGP              | IATMAPSPSPLPHH         |                        | 239 |
| <i>O. sativa</i>     | 181 | TTTTAF               | SYTGSPATADPFTVYNCWELDLHTAMQMGATT                          | GLSQDGP              | IATMAPSPSPLPHH         |                        | 239 |
|                      |     |                      |                                                           | 7 <sup>th</sup> exon | Del(TCG)               |                        |     |
| <i>O. glaberrima</i> | 240 | PPLHGFYGGQQQQG       | TTVNHMKAEP                                                |                      |                        |                        | 263 |
| <i>O. sativa</i>     | 240 | PPLHGFYGGQQQQG       | TTVNHMKAEP                                                |                      |                        |                        | 263 |

**Figure S1 Amino acid sequences of RAE1/An-1 in *O. glaberrima* and *O. sativa***

Amino acid sequences of RAE1/An-1 in *O. glaberrima* and *O. sativa* are aligned by ClustalW. Mutations in the DNA sequence are shown below the mutation sites. The thick gray bar under the aligned sequences represents a conserved bHLH domain. The thin black bars and gray bars above the aligned sequences indicate the region of exons.

**Table S1 Primers used in this study**

| Primers for linkage analysis of <i>RAE1</i> |                                |             |
|---------------------------------------------|--------------------------------|-------------|
| RAE1-38F                                    | AGATTGGTTTAGGCTGCAGG           | SSR         |
| RAE1-38R                                    | AAGGGCAGCAAATCAGGTAC           |             |
| RAE1-54F                                    | TCACTAGCACAATCCTCCTC           | SSR         |
| RAE1-54R                                    | GGCAAAGAACTTGTTTTGATGTTGTGAAG  |             |
| RAE1-78F                                    | TTCTAGCACTACTAGAAAACACGTTTCTGC | dCAPS(PstI) |
| RAE1-78R                                    | ATATTTTTGCAGGCGGGTGG           |             |
| RAE1-63F                                    | GCTACAGTCCACGCCGCAACCCTCCGGTAC | dCAPS(KpnI) |
| RAE1-63R                                    | CGTGCAATGTTTTAATCCGCC          |             |
| RAE1-69F                                    | GAAGGGCAGGAAAACAAGAG           | SSR         |
| RAE1-69R                                    | TTGTGTCCGGTGAGATTTGG           |             |
| RAE1-86F                                    | TGTATGAAATGTTACAGAACTTGCTCTCGA | dCAPS(XhoI) |
| RAE1-86R                                    | GTCATATGCGTGCACCTTGAC          |             |
| RAE1-53F                                    | TTGGAAAACACAGTGCCGTC           | SSR         |
| RAE1-53R                                    | CGATGGAGCAGTAGTTAGAG           |             |
| RAE1-44F                                    | AGCGTTCAACGTTTGGATGG           | SSR         |
| RAE1-44R                                    | TCAGAGACAGAGTCAAGTGC           |             |
| Primers for linkage analysis of <i>RAE3</i> |                                |             |
| RM341-F                                     | CAAGAAACCTCAATCCGAGC           | SSR         |
| RM341-R                                     | CTCCTCCCGATCCCAATC             |             |
| RM6346-F                                    | ACTTTGATCGATCAGCCACC           | SSR         |
| RM6346-R                                    | AGGTGGTGGAGATGAAGCAG           |             |
| RM20699-F                                   | CCCGAGCCAGACAACATTCC           | SSR         |
| RM20699-R                                   | GAGGTGTGAGGTGAGGAAGATGC        |             |
| 6KG27612-F                                  | TAGGTAGGAGTAGGCCGGAT           | Indel       |
| 6KG27612-R                                  | GCATGCACATATGTCACTGTGTAA       |             |
| 6KG28331-F                                  | CGATCTCCTTTGCATCTTTC           | Indel       |
| 6KG28331-R                                  | GGTGGTTAGCACCTTTGTGT           |             |
| 6KG28941-F                                  | CTCCTCTGATCACCTCGCT            | Indel       |
| 6KG28941-R                                  | GGAGAGGAGCAGCTTCTTG            |             |
| 6KG29384-F                                  | GTTTTGCTCAGGCAAATGAT           | Indel       |
| 6KG29384-R                                  | GCACCCAAGATTTTATTGGA           |             |
| 6KG29722-F                                  | ATGTTAGCCTTTTTCCTCCA           | Indel       |
| 6KG29722-R                                  | GGTCTTCGTTAGTCTTATGCATCT       |             |
| 6KG30196-F                                  | CTTGTTTCCATTTTGTGGG            | Indel       |
| 6KG30196-R                                  | GGAGGAAGAAGAGGACGAAG           |             |
