# Supplementary material for: Convergent Loss of Awn in Two Cultivated Rice Species Oryza sativa and Oryza glaberrima Is Caused by Mutations in Different Loci
Source: PubMed Central journal article supplement (PMC4632046; doi:10.1534/g3.115.020834), 2015-09-02
Supplement: supp_g3.115.020834_FigureS1.pdf [file supp_g3.115.020834_FigureS1.pdf]

|                      |     |                                                               |                      |                           |
|----------------------|-----|---------------------------------------------------------------|----------------------|---------------------------|
|                      |     | 1 <sup>st</sup> exon                                          | 2 <sup>nd</sup> exon |                           |
| <i>O. glaberrima</i> | 1   | MNP <del>T</del> TAAAADQPSKPS-AAAARKRKSSAKPKASSSSLP           |                      | TATAATNASPKRSKVAAGAGDD 59 |
| <i>O. sativa</i>     | 1   | MNP <del>T</del> TAAAADQPSKPSAAAAARKRKSSAKPKASSSSLP           |                      | TATAATNASPKRSKVAAGAGDD 60 |
|                      |     | Ins(GCC)                                                      | Sub(GCG -> ACG)      |                           |
|                      |     |                                                               | 3 <sup>rd</sup> exon | 4 <sup>th</sup> exon      |
| <i>O. glaberrima</i> | 60  | GDGDADAAEEKPEPAKDYIHVRARRGQATDSHSLAERVRRERISERMKLLQSLVPGCNKI  |                      | 119                       |
| <i>O. sativa</i>     | 61  | GDADADAAEEKPEPAKDYIHVRARRGQATDSHSLAERVRRERISERMKLLQSLVPGCNKI  |                      | 120                       |
|                      |     | Sub(GGC -> GCC)                                               |                      |                           |
|                      |     | 5 <sup>th</sup> exon                                          | 6 <sup>th</sup> exon |                           |
| <i>O. glaberrima</i> | 120 | TGKALMLDEI INYVQSLQRQVEFLSMKLATMNPQLDFDSHYMPSKDMSHMPVPAYPSGDP |                      | 179                       |
| <i>O. sativa</i>     | 121 | TGKALMLDEI INYVQSLQRQVEFLSMKLATMNPQLDFDSHYMPSKDMSHMPVPAYPSSDP |                      | 180                       |
|                      |     | Sub(GGC -> AGC)                                               |                      |                           |
| <i>O. glaberrima</i> | 180 | TTTTAFSYTGSPATADPFTVYNCWELDLHTAMQMGATT                        |                      | GLSQDGPATMAPSPSPLPHH 239  |
| <i>O. sativa</i>     | 181 | TTTTAFSYTGSPATADPFTVYNCWELDLHTAMQMGATT                        |                      | GLSQDGPATMAPSPSPLPHH 239  |
|                      |     | 7 <sup>th</sup> exon                                          | Del(TCG)             |                           |
| <i>O. glaberrima</i> | 240 | PPLHGFYGGQQQQGTTVNHMKAEP                                      |                      | 263                       |
| <i>O. sativa</i>     | 240 | PPLHGFYGGQQQQGTTVNHMKAEP                                      |                      | 263                       |

**Figure S1 Amino acid sequences of RAE1/An-1 in *O. glaberrima* and *O. sativa***

Amino acid sequences of RAE1/An-1 in *O. glaberrima* and *O. sativa* are aligned by ClustalW. Mutations in the DNA sequence are shown below the mutation sites. The thick gray bar under the aligned sequences represents a conserved bHLH domain. The thin black bars and gray bars above the aligned sequences indicate the region of exons.
