# Supplementary material for: Convergent Loss of Awn in Two Cultivated Rice Species Oryza sativa and Oryza glaberrima Is Caused by Mutations in Different Loci
Source: PubMed Central journal article supplement (PMC4632046; doi:10.1534/g3.115.020834), 2015-09-02
Supplement: supp_g3.115.020834_TableS1.pdf [file supp_g3.115.020834_TableS1.pdf]

**Table S1 Primers used in this study**

| Primers for linkage analysis of <i>RAE1</i> |                                |             |
|---------------------------------------------|--------------------------------|-------------|
| RAE1-38F                                    | AGATTGGTTTAGGCTGCAGG           | SSR         |
| RAE1-38R                                    | AAGGGCAGCAAATCAGGTAC           |             |
| RAE1-54F                                    | TCACTAGCACAATCCTCCTC           | SSR         |
| RAE1-54R                                    | GGCAAAGAACTTGTTTTGATGTTGTGAAG  |             |
| RAE1-78F                                    | TTCTAGCACTACTAGAAAACACGTTTCTGC | dCAPS(PstI) |
| RAE1-78R                                    | ATATTTTTGCAGGCGGGTGG           |             |
| RAE1-63F                                    | GCTACAGTCCACGCCGCAACCCTCCGGTAC | dCAPS(KpnI) |
| RAE1-63R                                    | CGTGCAATGTTTTAATCCGCC          |             |
| RAE1-69F                                    | GAAGGGCAGGAAAACAAGAG           | SSR         |
| RAE1-69R                                    | TTGTGTCCGGTGAGATTTGG           |             |
| RAE1-86F                                    | TGTATGAAATGTTACAGAACTTGCTCTCGA | dCAPS(XhoI) |
| RAE1-86R                                    | GTCATATGCGTGCACCTTGAC          |             |
| RAE1-53F                                    | TTGGAAAACACAGTGCCGTC           | SSR         |
| RAE1-53R                                    | CGATGGAGCAGTAGTTAGAG           |             |
| RAE1-44F                                    | AGCGTTCAACGTTTGGATGG           | SSR         |
| RAE1-44R                                    | TCAGAGACAGAGTCAAGTGC           |             |
| Primers for linkage analysis of <i>RAE3</i> |                                |             |
| RM341-F                                     | CAAGAAACCTCAATCCGAGC           | SSR         |
| RM341-R                                     | CTCCTCCCGATCCCAATC             |             |
| RM6346-F                                    | ACTTTGATCGATCAGCCACC           | SSR         |
| RM6346-R                                    | AGGTGGTGGAGATGAAGCAG           |             |
| RM20699-F                                   | CCCGAGCCAGACAACATTCC           | SSR         |
| RM20699-R                                   | GAGGTGTGAGGTGAGGAAGATGC        |             |
| 6KG27612-F                                  | TAGGTAGGAGTAGGCCGGAT           | Indel       |
| 6KG27612-R                                  | GCATGCACATATGTCACTGTGTAA       |             |
| 6KG28331-F                                  | CGATCTCCTTTGCATCTTTC           | Indel       |
| 6KG28331-R                                  | GGTGGTTAGCACCTTTGTGT           |             |
| 6KG28941-F                                  | CTCCTCTGATCACCTCGCT            | Indel       |
| 6KG28941-R                                  | GGAGAGGAGCAGCTTCTTG            |             |
| 6KG29384-F                                  | GTTTTGCTCAGGCAAATGAT           | Indel       |
| 6KG29384-R                                  | GCACCCAAGATTTTATTGGA           |             |
| 6KG29722-F                                  | ATGTTAGCCTTTTTCCTCCA           | Indel       |
| 6KG29722-R                                  | GGTCTTCGTTAGTCTTATGCATCT       |             |
| 6KG30196-F                                  | CTTGTTTCCATTTTGTGGG            | Indel       |
| 6KG30196-R                                  | GGAGGAAGAAGAGGACGAAG           |             |
